# Supplementary material
Source: PubMed Central journal article supplement (PMC6880895)

**Supplemental Table 1: Geriatric Assessment Tools**

| Domains                                         | Geriatric Assessment Tools*                                                                               | Additional Provider Directed Assessments                                                  |                     |
|-------------------------------------------------|-----------------------------------------------------------------------------------------------------------|-------------------------------------------------------------------------------------------|---------------------|
|                                                 |                                                                                                           | Tools                                                                                     | Provider Performing |
| Comorbidity                                     | OARS physical health                                                                                      | HCT-CI                                                                                    | APP                 |
|                                                 |                                                                                                           | ID evaluation                                                                             | ID                  |
| Patient-Reported Functional Status              | KPS by patient<br>MOS physical health<br>MOS social activities<br>IADL<br>Falls in last 6 months<br>SF-36 |                                                                                           |                     |
| Performance or Provider-Based Functional Status | Timed up-and-go<br>Handgrip strength<br>4-meter walk test                                                 | Single leg stance<br>Range of motion<br>Posture<br>Strength testing<br>6-minute walk test | PT/OT               |
|                                                 |                                                                                                           | KPS by provider                                                                           | APP, MD             |
| Social Support                                  | MOS social support                                                                                        | Transportation<br>Caregiver<br>Caregiver contract<br>Insurance coverage                   | SW, APP             |
| Cognition                                       | BOMC                                                                                                      | MoCA                                                                                      | GO                  |
| Psychological                                   | MHI-17<br>SF-36 mental health                                                                             | Substance abuse<br>GDS                                                                    | GO, SW              |
| Nutritional Status                              | Body mass index<br>Weight loss                                                                            | ASPEN Malnutrition<br>MST<br>MUST                                                         | Nutrition           |
| Polypharmacy                                    | List of medications                                                                                       | Beers Criteria                                                                            | GO, MD              |
| Biomarkers                                      |                                                                                                           | C-Reactive Protein<br>Albumin                                                             | MD                  |

\*Tools from the cancer-specific geriatric assessment by Hurria et al. *JCO* 2011; 29(10):1290-1296

**Abbreviations:** ASPEN = American Society for Parenteral and Enteral Nutrition; BOMC = Blessed-Oriented-Memory Concentration; GDS = Geriatric Depression Scale; HCT-CI = Hematopoietic Cell Transplantation-Specific Comorbidity Index; IADL = Independent Activities of Daily Living; KPS = Karnofsky Performance Status; MHI-17 = Mental Health Inventory-17; MoCA = Montreal Cognitive Assessment; MOS = Medical Outcomes Study; MST = Malnutrition Screening Tool; MUST = Malnutrition Universal Screening Tool; OARS = Older Americans Resources and Services; SF-36 = 36-Item Short-Form Health Survey. Providers: APP = Transplant advanced practice practitioner, GO = Geriatric oncology physician; ID = Infectious disease physician, MD = Transplant physician; Nutrition = Nutritionist, PT/OT = Physical Therapy/Occupational therapy; SW = Social work.

**Supplemental Table 2:** Characteristics and Feasibility of Patient-Reported Measures from the Multidisciplinary Clinic

| <b>Feasibility Characteristic</b>                            | <b>Allogeneic Candidates (2013-2018)</b> | <b>Autologous Candidates (2015-2018)</b> |
|--------------------------------------------------------------|------------------------------------------|------------------------------------------|
| Completed Health Status Survey, n                            | 139                                      | 85                                       |
| Paper Survey                                                 | 57 (41%)                                 | 29 (34.1%)                               |
| Electronic Survey                                            | 82 (59%)                                 | 56 (65.9%)                               |
| Completed SF-36, n                                           | 135                                      | 84                                       |
| Paper Survey                                                 | 50 (37%)                                 | 27 (32.1%)                               |
| Electronic Survey                                            | 85 (63%)                                 | 57 (67.9%)                               |
| Median Time to Complete Electronic Health Status Survey, n   | 79                                       | 54                                       |
|                                                              | 14m 50s                                  | 15m 46s                                  |
| Median Time to Complete Electronic SF-36, n                  | 83                                       | 56                                       |
|                                                              | 14m 08s                                  | 15m 55s                                  |
| Preference for Computer-Based Survey Over Paper-Based Survey | 88/116 (75.9%)                           | 47/78 (60.3%)                            |
| Among Those Who Completed Paper Survey                       | 25/41 (61%)                              | 11/24 (45.8%)                            |
| Among Those Who Completed Computer Survey                    | 63/75 (84%)                              | 36/54 (66.7%)                            |
| Computer Skill Level, n                                      | 118                                      | 77                                       |
| None                                                         | 10 (8.5%)                                | 14 (18.2%)                               |
| Beginner                                                     | 19 (16.1%)                               | 20 (26%)                                 |
| Intermediate                                                 | 72 (61%)                                 | 40 (51.9%)                               |
| Advanced                                                     | 17 (14.4%)                               | 3 (3.9%)                                 |
| <b>Patient Perspectives on Health Status Survey</b>          |                                          |                                          |
| Survey Length, n                                             | 136                                      | 81                                       |
| Just Right                                                   | 125 (91.9%)                              | 70 (86.4%)                               |
| Too Long                                                     | 10 (7.4%)                                | 11 (13.6%)                               |
| Too Short                                                    | 1 (<1%)                                  | 0 (0%)                                   |
| Ease of Survey Completion, n                                 | 110                                      | 70                                       |
| Very Easy                                                    | 67 (60.9%)                               | 30 (42.9%)                               |
| Easy                                                         | 36 (32.7%)                               | 30 (42.9%)                               |
| Difficult                                                    | 3 (2.7%)                                 | 5 (7.1%)                                 |
| Very Difficult                                               | 4 (3.7%)                                 | 5 (7.1%)                                 |
| Questions Upsetting                                          | 3/135 (2.2%)                             | 1/82 (1.2%)                              |
| Questions Difficult to Understand                            | 14/138 (10.1%)                           | 10/83 (12%)                              |

**Supplemental Table 3: Geriatric Vulnerabilities Among Patients Meeting Age Requirement to Attend the Multidisciplinary Clinic**

|                                              | <b>Autologous Candidates<br/>≥70 years old<br/>(n=52)</b> | <b>Allogeneic Candidates<br/>≥ 60 years old<br/>(n=140)</b>                                               | <b>p-value</b> |
|----------------------------------------------|-----------------------------------------------------------|-----------------------------------------------------------------------------------------------------------|----------------|
| <b>Age in years, median (range)</b>          | 72.5 (70-83)                                              | 66.8 (60-81)                                                                                              | <0.001         |
| <b>Diagnosis</b>                             | PCD: 33 (63.5%)<br>NHL: 19 (36.5%)                        | AML: 65 (46.4%)<br>MDS: 27 (19.3%)<br>MPD: 16 (11.4%)<br>NHL: 14 (10%)<br>ALL: 11 (7.9%)<br>Other: 7 (5%) | -              |
| <b>IADL, n</b>                               | 50                                                        | 128                                                                                                       |                |
| Median (range)                               | 14 (6-14)                                                 | 14 (4-14)                                                                                                 | 0.094          |
| Impaired (<14)                               | 24 (48%)                                                  | 47 (36.7%)                                                                                                | 0.18           |
| <b>HCT-CI, n</b>                             | 52                                                        | 131                                                                                                       |                |
| Median (range)                               | 2.5 (0-10)                                                | 2 (0-7)                                                                                                   | 0.43           |
| Score ≥ 3                                    | 25 (48.1%)                                                | 59 (45%)                                                                                                  | 0.74           |
| <b>Self-Rated KPS, n</b>                     | 48                                                        | 130                                                                                                       |                |
| Median                                       | 90 (40-100)                                               | 90 (50-100)                                                                                               | 0.91           |
| <b>BOMC, n</b>                               | 51                                                        | 139                                                                                                       |                |
| Median                                       | 4 (0-17)                                                  | 4 (0-17)                                                                                                  | 0.089          |
| ≥ 6                                          | 19 (37.3%)                                                | 44 (31.7%)                                                                                                | 0.49           |
| ≥ 11                                         | 6 (11.8%)                                                 | 8 (5.8%)                                                                                                  | 0.21           |
| <b>4-meter walk test, n</b>                  | 50                                                        | 135                                                                                                       |                |
| Frail <sup>¶</sup> (%)                       | 11 (22%)                                                  | 17 (12.6%)                                                                                                | 0.16           |
| <b>Falls in the Last 6 months</b>            | 6/46 (13%)                                                | 19/118 (16.1%)                                                                                            | 0.49           |
| <b>Weight loss &gt; 10% in Last 6 Months</b> | 7/45 (15.6%)                                              | 32/128 (25%)                                                                                              | 0.22           |
| <b>Number of Prescribed Medications, n</b>   | 40                                                        | 110                                                                                                       |                |
| Median (range)                               | 5 (0-14)                                                  | 5 (0-20)                                                                                                  | 0.66           |
| <b>Polypharmacy (&gt;4 medications)</b>      | 23/45 (51.1%)                                             | 60/110 (54.5%)                                                                                            | 0.73           |
| <b>MOS Social Support Survey, n</b>          | 45                                                        | 122                                                                                                       |                |
| Median (range)                               | 97.9 (66.7-100)                                           | 97.9 (47.9-100)                                                                                           | 0.71           |
| <b>Mental Health Index-5, n</b>              | 46                                                        | 125                                                                                                       |                |
| Median (range)                               | 88 (56-100)                                               | 88 (52-100)                                                                                               | 0.98           |
| Score ≤ 76                                   | 10 (21.7%)                                                | 27 (21.6%)                                                                                                | 1              |

<sup>¶</sup>Frailty is as described in Table 3.

**Abbreviations:** ALL = acute lymphoblastic leukemia; AML = acute myeloid leukemia; BOMC = blessed-orientation-memory concentration; CAR-T = chimeric antigen receptor T-cell therapy; HCT-CI = Hematopoietic cell transplantation-specific comorbidity index; IADL = independent activities of daily living; KPS = karnofsky performance status; MDS = myelodysplastic syndrome; MOS = medical outcomes study; MPD = myeloproliferative disease; NHL = non-hodgkin lymphoma; PCD = plasma cell dyscrasia; TOP = Transplant Optimization Program

**Supplemental Table 4:** Outcomes of Autograft Recipients Age 70 Years and Older During the TOP Multidisciplinary Clinic Era, 2015-2018

|                                                        | <b>Autograft Recipients</b> |
|--------------------------------------------------------|-----------------------------|
| <b>Received Cellular Therapy</b>                       | 31                          |
| After Initial Deferral                                 | 4                           |
| After Declined                                         | 0                           |
| <b>Age in years, median (range)</b>                    | 70.5 (70-77)                |
| <b>Age <math>\geq</math> 70, %</b>                     | 31 (100%)                   |
| <b>Diagnosis</b>                                       |                             |
| <b>MM</b>                                              | 21 (67.7%)                  |
| <b>NHL</b>                                             | 10 (32.3%)                  |
| <b>HCT-CI score, n</b>                                 | 31                          |
| <b>Median (range)</b>                                  | 2 (0-9)                     |
| <b>Score <math>\geq</math> 3</b>                       | 13 (41.9%)                  |
| <b>IADL score, n</b>                                   | 30                          |
| <b>Median (range)</b>                                  | 14 (10-14)                  |
| <b>IADL &lt; 14</b>                                    | 12 (40%)                    |
| <b>Regimen</b>                                         |                             |
| Melphalan 140 mg/m <sup>2</sup>                        | 3 (9.7%)                    |
| Melphalan 200 mg/m <sup>2</sup>                        | 19 (61.3%)                  |
| BEAM                                                   | 6 (19.3%)                   |
| Carmustine/Thiotepa                                    | 3 (9.7%)                    |
| <b>Outcomes</b>                                        |                             |
| <b>Inpatient Deaths During Initial Hospitalization</b> | 0 (0%)                      |
| <b>Length of inpatient stay in days, median (IQR)</b>  | 14 (12-16)                  |
| <b>Discharge to Nursing Facility By Day +100</b>       | 3 (9.7%)                    |
| <b>Readmission By Day +100</b>                         | 5 (16.1%)                   |
| <b>Death within Day +100</b>                           | 1 (3.2%)                    |
| <b>1-year Overall Survival</b>                         | 96.8%*                      |
| <b>1-year Non-Relapse Mortality</b>                    | 0%                          |

\*Excludes 3 patients with less than 1 year of follow-up.

Abbreviations: BEAM = Carmustine, etoposide, cytarabine, melphalan; HCT-CI = HCT-CI = Hematopoietic cell transplantation-specific comorbidity index; IADL = independent activities of daily living; MM = multiple myeloma; NHL = non-Hodgkin lymphoma; TOP = Transplant Optimization Program.

**Supplemental Table 5:** Allogeneic Transplantation Outcomes in Deferred vs Non-Deferred Patients 60 years and older

| Characteristics                                  | Initial Recommendation |              |         |
|--------------------------------------------------|------------------------|--------------|---------|
|                                                  | Proceed (n=72)         | Defer (n=13) | p-value |
| Age in years, median (range)                     | 67 (60 -75)            | 65.6 (60-71) | 0.18    |
| Age $\geq$ 70                                    | 18 (25%)               | 1 (7.7%)     | 0.28    |
| HCT-CI score, median (range)                     | 1 (0-8)                | 2 (0-6)      | 0.34    |
| HCT-CI $\geq$ 3                                  | 26 (36.1%)             | 6 (46.2%)    | 0.54    |
| Days from Evaluation to Transplant, median (IQR) | 34.5 (21-54)           | 76 (62-89)   | <0.001  |
| Length of inpatient stay in days, median (IQR)   | 14 (13-17)             | 14 (12-18)   | 0.74    |
| <b>Events by Day +100</b>                        |                        |              |         |
| Discharge to Nursing Facility                    | 1 (1.4%)               | 1 (7.7%)     | 0.28    |
| Readmission                                      | 41 (56.9%)             | 11 (84.7%)   | 0.071   |
| Death                                            | 3 (4.2%)               | 3 (23.1%)    | 0.043   |
| <b>Events by 1 Year</b>                          |                        |              |         |
| 1-Year OS                                        | 64.1%*                 | 46.2%        | 0.35    |
| 1-Year NRM                                       | 21.9%*                 | 38.5%        | 0.29    |

\*Excludes 8 patients with less than 1 year of follow-up.

**Supplemental Figure 1: Time to first readmission within the first 100 days after allogeneic stem cell infusion for patients 60 years and older after first hospital discharge for three cohorts: Pre-TOP (Pre-Transplant Optimization Program Multidisciplinary Clinic, 2005-2012), TOP initial (2013-2014), and TOP modern (2015-2017).**

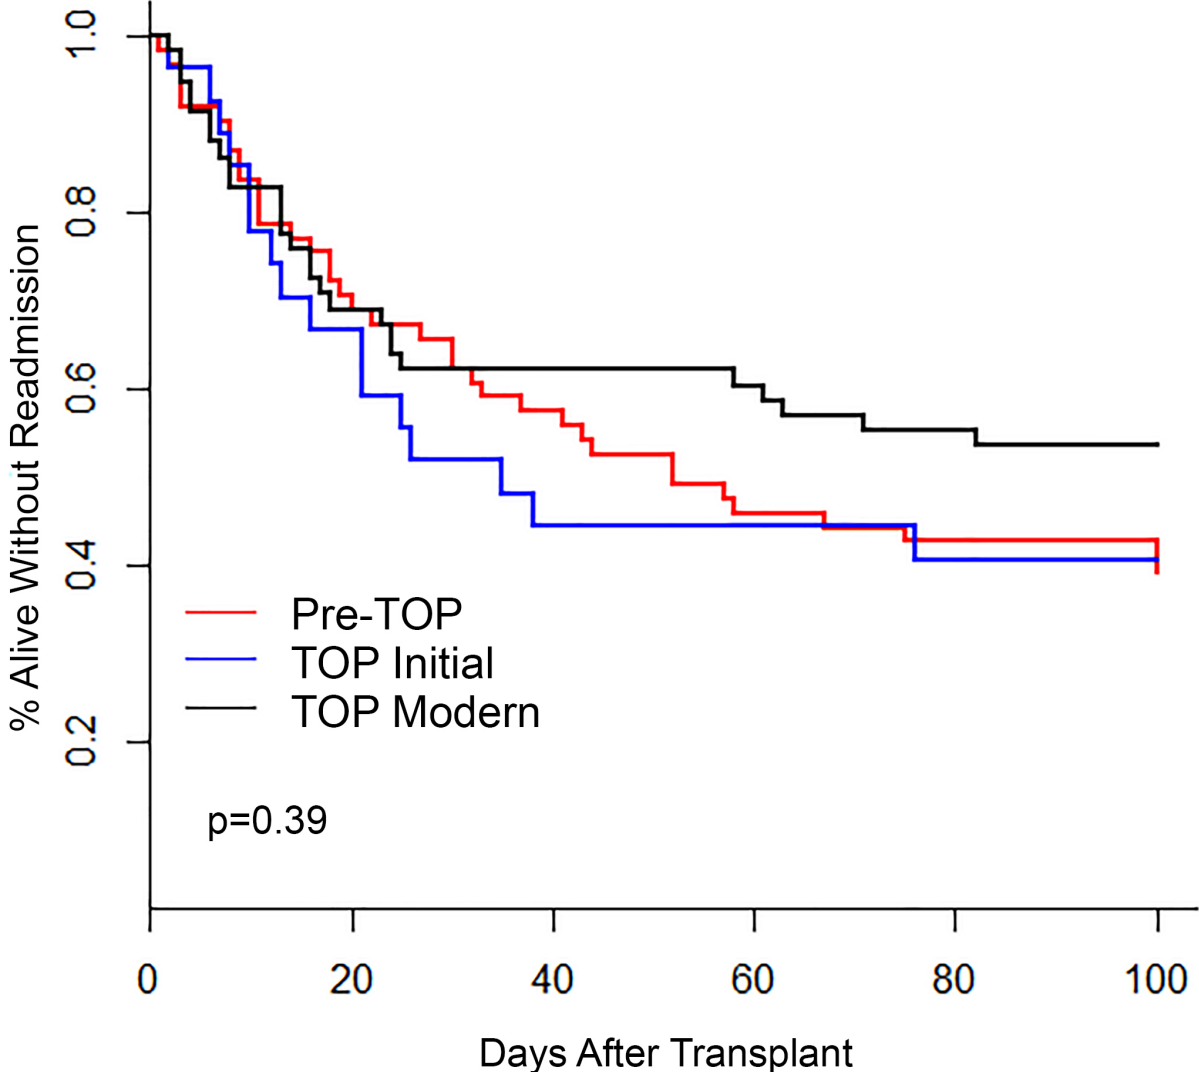

Supplement: baADV2019000790-suppl1.pdf [file baADV2019000790-suppl1.pdf]
